# Supplementary material for: Association of Perioperative Plasma Neutrophil Gelatinase-Associated Lipocalin Levels with 3-Year Mortality after Cardiac Surgery: A Prospective Observational Cohort Study
Source: PLOS journal article supplement (doi:10.1371/journal.pone.0129619), 2015-06-08
Supplement: S1 (10.1371/journal.pone.0129619.s001) [file journal.pone.0129619.s001]

**Supplementary Table 1.** Baseline Characteristics by Pre-op Plasma NGAL Tertiles

|                                                   | Pre-op Plasma NGAL Tertiles |                     |                      |            |
|---------------------------------------------------|-----------------------------|---------------------|----------------------|------------|
|                                                   | T1: <60<br>N=589            | T2: 60-77<br>N= 156 | T3: 77-1300<br>N=376 | P<br>value |
| <b>Demographics</b>                               |                             |                     |                      |            |
| Age at the time of surgery, mean (SD)             | 70.93 (10.07)               | 71.84 (9.65)        | 72.49 (10.05)        | 0.04       |
| Men                                               | 395 (66%)                   | 103 (64%)           | 280 (73%)            | <0.001     |
| White Race                                        | 551 (93%)                   | 146 (93%)           | 356 (94%)            | 0.72       |
| <b>Medical History (time of surgery)</b>          |                             |                     |                      |            |
| Diabetes                                          | 229 (39%)                   | 63 (40%)            | 147 (39%)            | 0.95       |
| Hypertension                                      | 460 (78%)                   | 119 (76%)           | 308 (82%)            | 0.22       |
| LVEF <40%                                         | 60 (10%)                    | 8 (5%)              | 44 (12%)             | 0          |
| Previous myocardial infarction                    | 151 (26%)                   | 42 (27%)            | 96 (25%)             | 0.95       |
| eGFR (mL/min per 1.73 m <sup>2</sup> ), mean (SD) | 71.92 (17.87)               | 68.4 (17.03)        | 60.17 (20.38)        | <.001      |
| Pre-op eGFR stage 1                               | 98 (16%)                    | 17 (11%)            | 24 (6%)              | <.001      |
| Pre-op eGFR stage 2                               | 354 (59%)                   | 90 (56%)            | 169 (44%)            |            |
| Pre-op eGFR stage 3                               | 143 (24%)                   | 50 (31%)            | 163 (43%)            |            |
| Pre-op eGFR stage 4                               | 7 (1%)                      | 3 (2%)              | 25 (7%)              |            |
| Serum Creatinine (mg/DL), median [IQR]            | 1 (0.8, 1.1)                | 1 (0.9, 1.2)        | 1.1 (1, 1.4)         | <.001      |
| Urine albumin to creatinine                       |                             |                     |                      |            |
| <=10.0                                            | 233 (39%)                   | 68 (43%)            | 103 (27%)            | <0.001     |
| 10.0-30                                           | 186 (31%)                   | 41 (26%)            | 113 (30%)            |            |
| 30-300                                            | 143 (24%)                   | 39 (25%)            | 131 (35%)            |            |
| >=300                                             | 29 (5%)                     | 9 (6%)              | 30 (8%)              |            |
| <b>Surgical Characteristics</b>                   |                             |                     |                      |            |
| Elective Surgery                                  | 467 (79%)                   | 121 (77%)           | 309 (82%)            | 0.36       |
| Surgery, CABG                                     | 310 (51%)                   | 85 (53%)            | 156 (41%)            | 0.01       |
| CABG + Valve                                      | 130 (22%)                   | 34 (21%)            | 96 (25%)             |            |
| Valve                                             | 162 (27%)                   | 41 (26%)            | 129 (34%)            | 0.08       |
| Off-pump                                          | 48 (8%)                     | 23 (15%)            | 41 (11%)             |            |
| Re-do surgery                                     | 9 (2%)                      | 2 (1%)              | 8 (2%)               | 0.72       |
| Perfusion time (minutes), mean (SD)               | 112.64 (55.67)              | 109.21 (67.1)       | 119.43 (63.98)       | 0.08       |

|                                                |              |               |               |        |
|------------------------------------------------|--------------|---------------|---------------|--------|
| Cross-clamp time (minutes), mean (SD)          | 75.15 (41.5) | 73.13 (47.09) | 83.86 (47.66) | 0.006  |
| <b>Post-operative Complications</b>            |              |               |               |        |
| Clinical AKI                                   | 20 (3%)      | 3 (2%)        | 25 (7%)       | 0.02   |
| Oliguria in first day                          | 6 (1%)       | 3 (2%)        | 6 (2%)        | 0.59   |
| Delta Peak Serum Creatinine (mg/dL), mean (SD) | 0.17 (0.33)  | 0.2 (0.29)    | 0.27 (0.47)   | <.0001 |
| ICU LOS, median [IQR]                          | 2 [1, 3]     | 2 [1, 3]      | 2 [1, 4]      | <0.001 |
| Hospital LOS, median [IQR]                     | 6 [5, 8]     | 6 [5, 9]      | 7 [5, 9]      | <0.001 |

Abbreviations and definitions:

Data presented as number (percent) unless otherwise specified.

LVEF- left ventricular ejection fraction, eGFR- estimate glomerular filtration rate, ICU- intensive care unit, LOS- length of stay, IQR- interquartile range; Clinical AKI defined as change in serum creatinine of  $\geq 100\%$  from pre- to the peak post-operative value. Oliguria defined as a patient who had <125 cc in 6 hours or <500 cc urine output in 24 hours;

Note: To convert serum creatinine values to mmol/L, multiply by 88.4.
